# Supplementary material for: Multifaceted core–shell nanoparticles: superparamagnetism and biocompatibility
Source: Royal Society of Chemistry journal article supplement (doi:10.1039/c5nj01481f), 2015-01-01
Supplement: c5nj01481f1.pdf [file c5nj01481f1.pdf]

## Multifaceted core-shell nanoparticles: superparamagnetism and biocompatibility

Debasmita Sardar,<sup>a,b</sup> S. K. Neogi,<sup>b,c</sup> S. Bandyopadhyay,<sup>b,c</sup> Biswarup Satpati,<sup>d</sup> Manisha Ahir,<sup>b</sup>  
Arghya Adhikary,<sup>b</sup> Ruchi Jain,<sup>c</sup> Chinnakonda S. Gopinath<sup>e</sup> and Tanushree Bala<sup>a,b\*</sup>

### Supporting Information SI-1

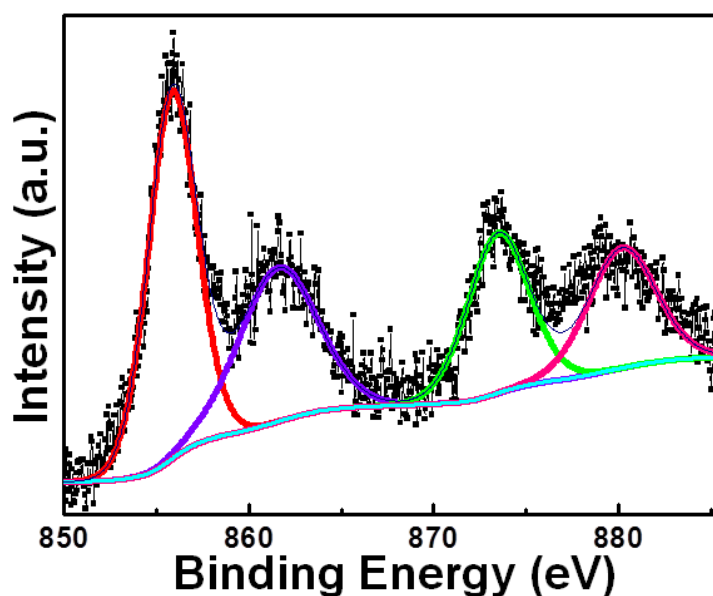

**Figure SI-1:** XPS spectra of Ni 2p obtained from pristine Ni nanoparticles.

Supporting Information SI-2

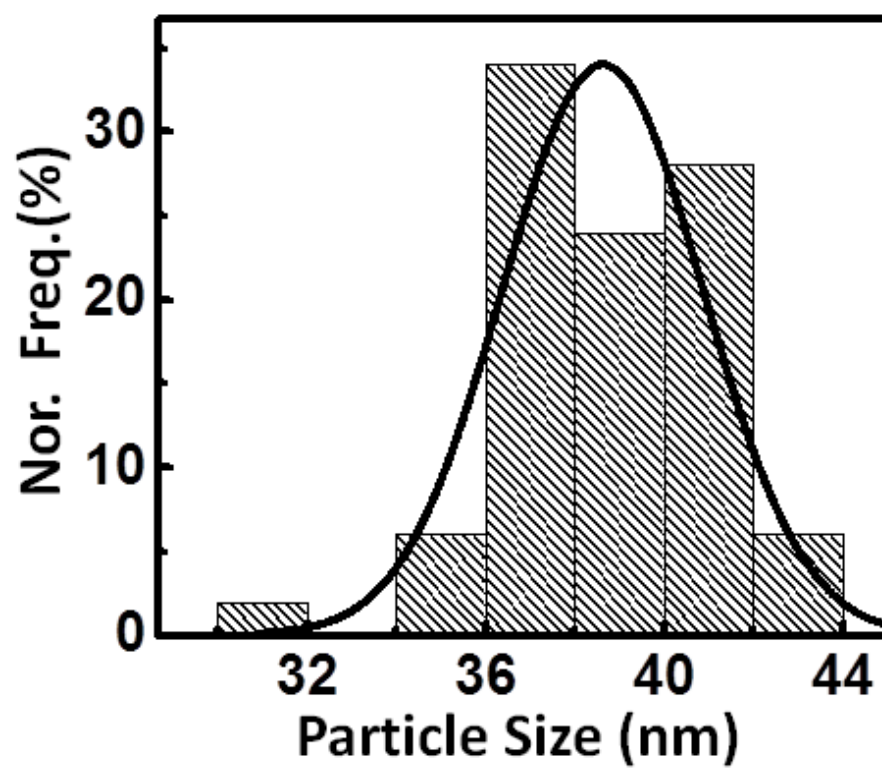

**Figure SI-2:** Size distribution histogram of Ni nanoparticles

### Supporting Information SI-3

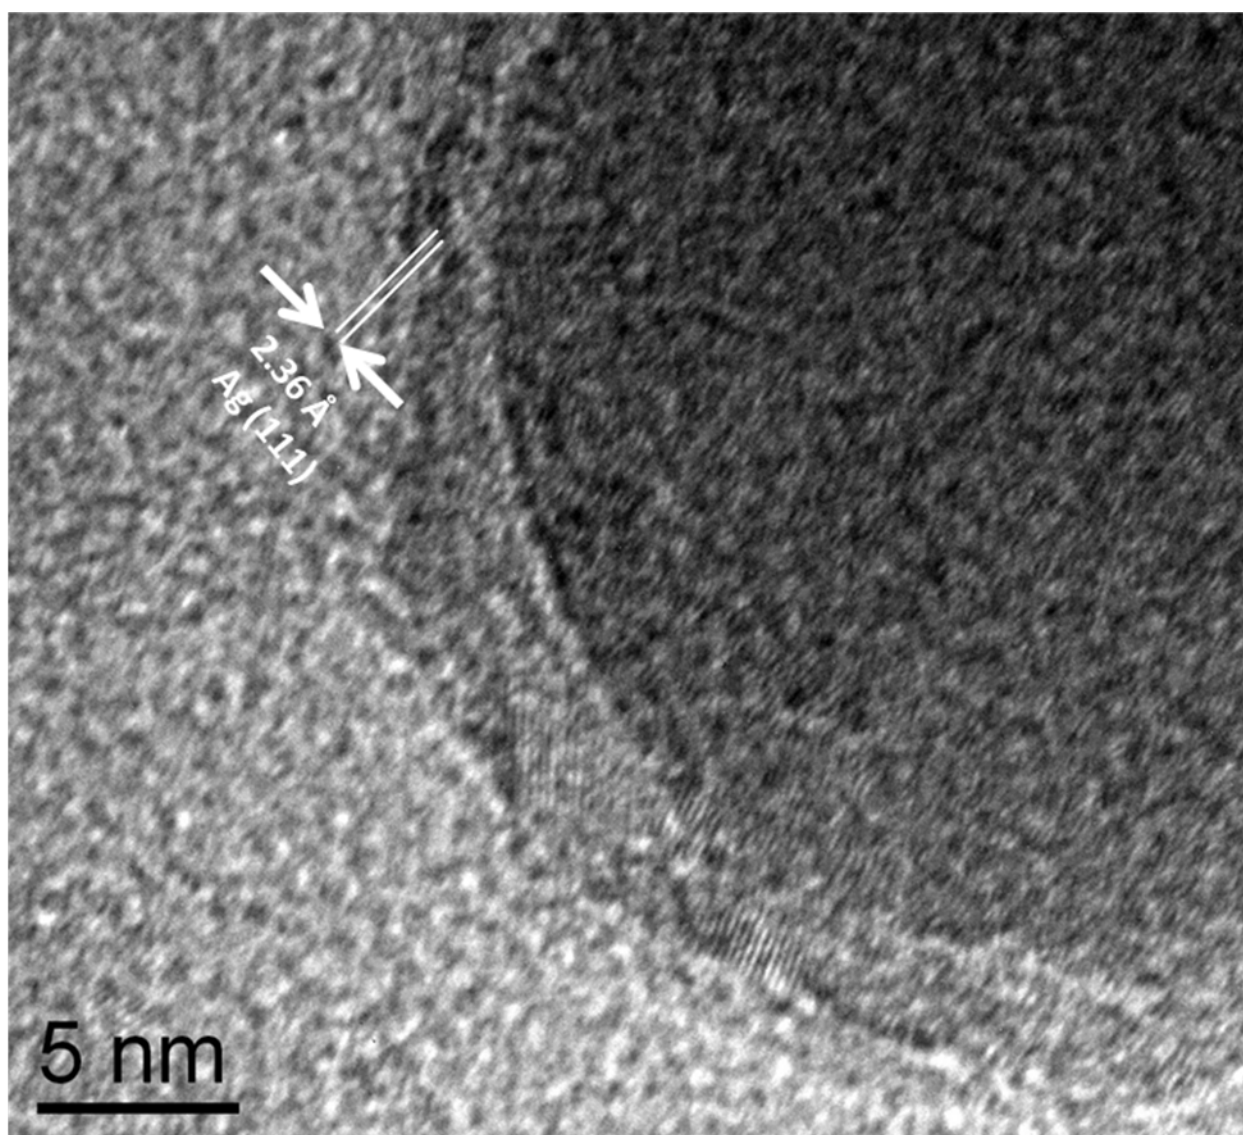

**Figure SI-3:** Magnified HRTEM image of Ni@Ag shell nanoparticles showing the presence of Ag (111) plane.

#### Supporting Information SI-4

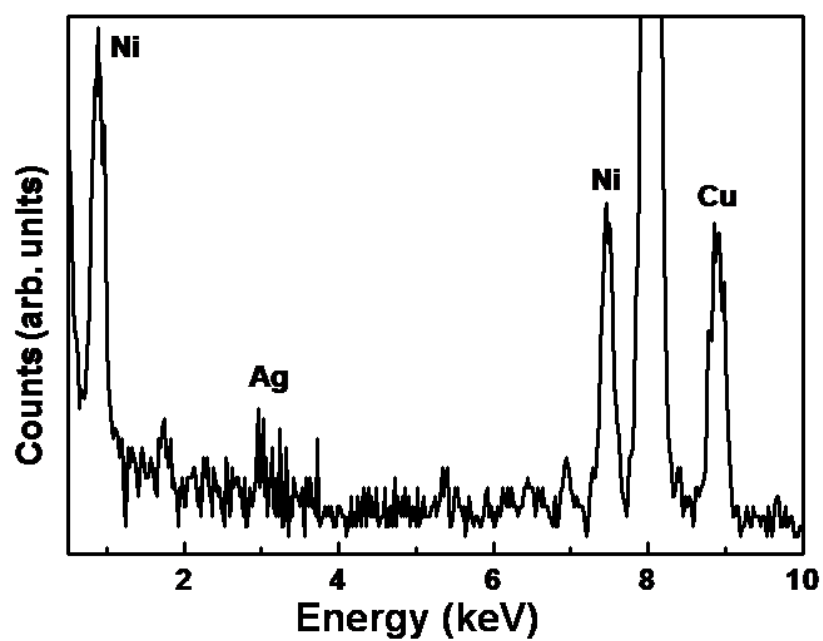

**Figure SI-4:** EDX spectra obtained from  $\text{Ni}_{\text{core}}\text{Ag}_{\text{shell}}$  nanoparticles.

## Supporting Information SI-5

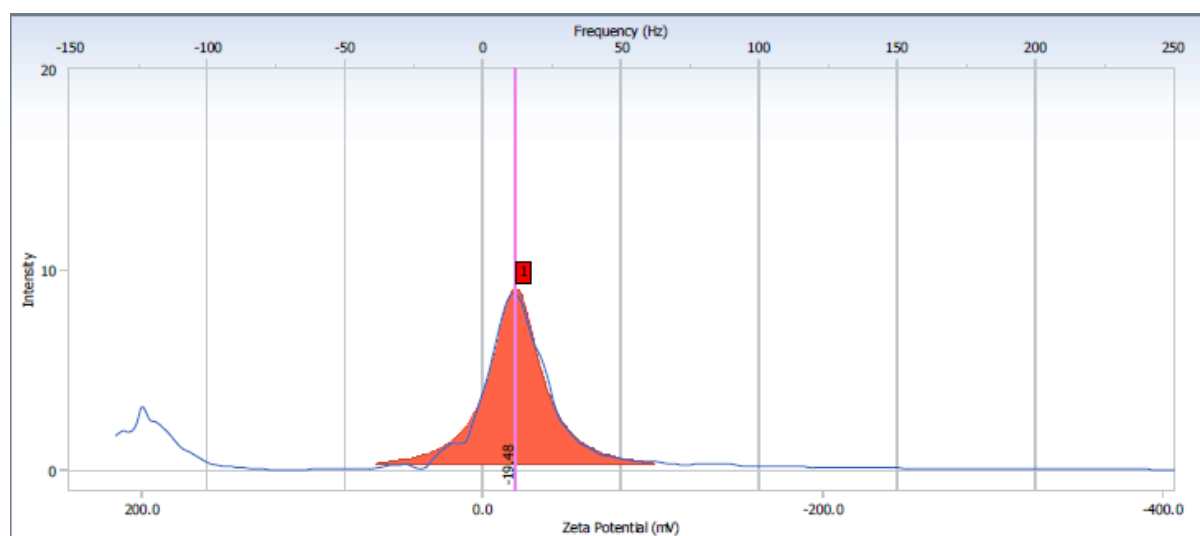

**Figure SI-5:** Raw data of Zeta potential of colloidal Ni nanoparticles.

## Supporting Information SI-6

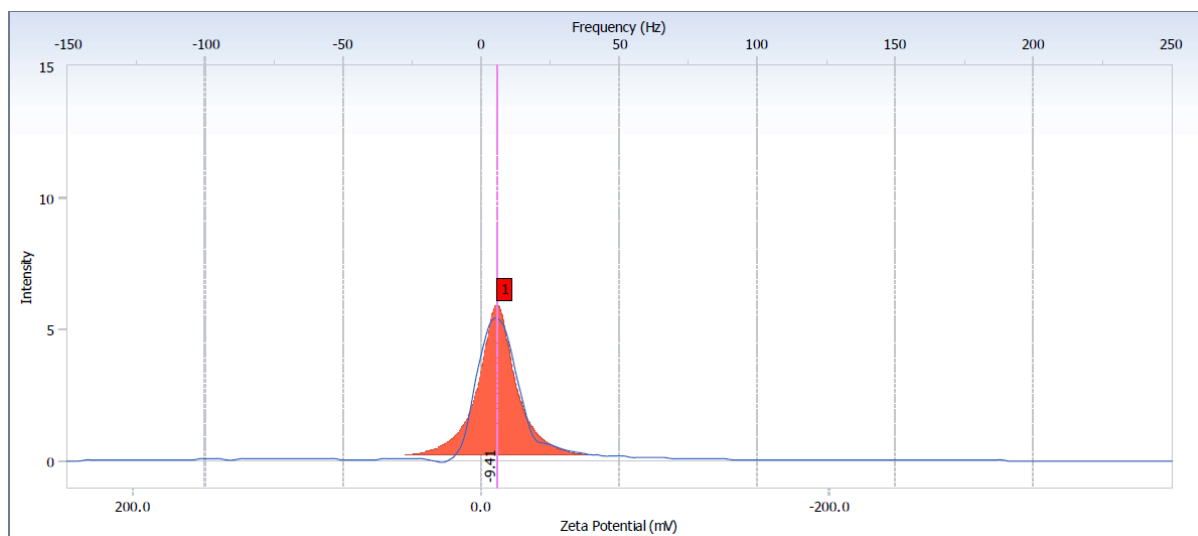

**Figure SI-6:** Raw data of Zeta potential of L-Tryptophan modified Ni Nanoparticles.

### Supporting Information SI-7

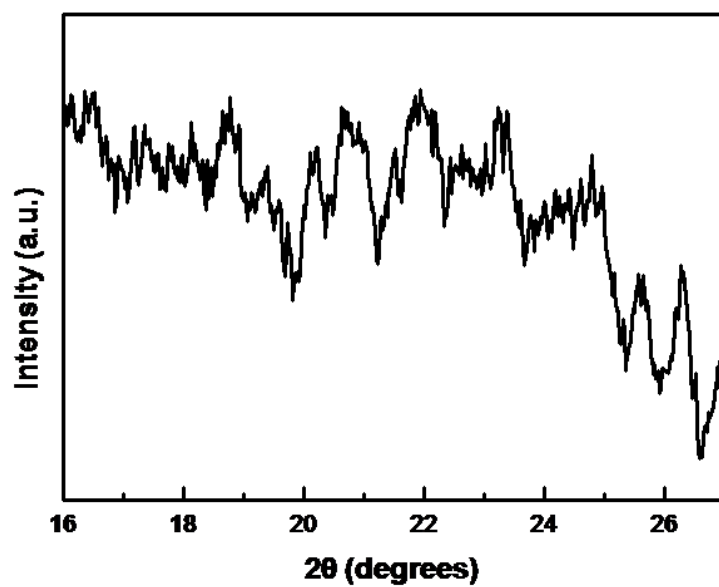

**Figure SI-7:** Magnified XRD of Ni<sub>core</sub> Au<sub>shell</sub> in the range  $2\theta=16^{\circ}$ - $27^{\circ}$ .

### Supporting Information SI-8

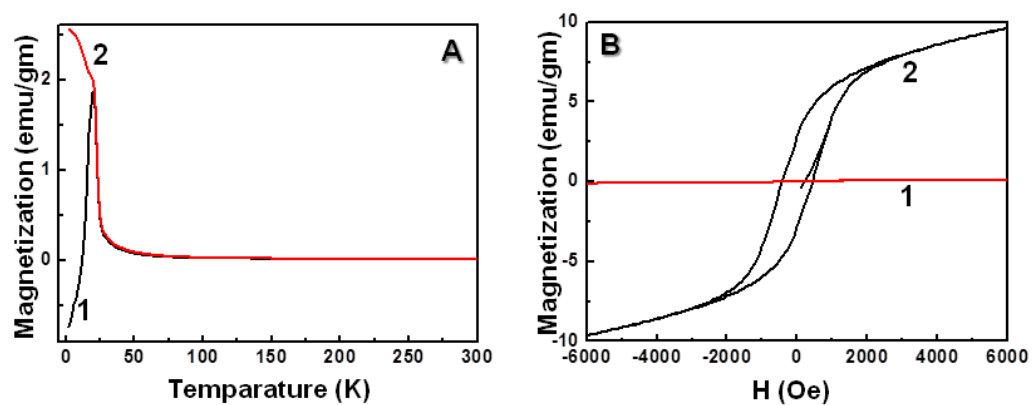

**Figure SI-8:** (A) Temperature dependent magnetization (applied magnetic field = 150 Oe) for zero field cooled measurement (ZFC, Curve 1) and for field cooled measurement (FC, Curve 2), (B) Field dependent magnetization at 300K (Curve 1) and 10 K (Curve 2) for crude Ni nanoparticles.
